# Supplementary material
Source: publisher figshare collection journal article supplement (https://sage.figshare.com/ndownloader/files/22827113)
Supplement: Supplementary file 1 [file 22827113]

**Appendix 1 – Search Strategy:**

**Database:** Ovid MEDLINE(R) In-Process & Other Non-Indexed

**Citations:** Ovid MEDLINE(R) Daily and Ovid MEDLINE(R) <1946 to Present>

Search Strategy:

1. exp SKIN ULCER/ or exp SKIN ABNORMALITIES/ or exp SKIN MANIFESTATIONS/ or exp SKIN DISEASES/ or exp “NEOPLASMS, ADNEXAL AND SKIN APPENDAGE”/ or exp SKIN PIGMENTATION/ or exp SKIN NEOPLASMS/ or exp SKIN TRANSPLANTATION/ or exp SKIN AGING/ or exp CARCINOMA, SKIN APPENDAGE/ or exp SKIN PHYSIOLOGICAL PHENOMAENA/ or exp SKIN CARE/ (1079478)
2. exp Fish Oils/ or exp Docosahexaenoic Acids/ or exp Fatty Acids, Omega-3/ or exp Eicosapentaenoic Acid/ (27257)
3. 1 and 2 (733)
4. exp Therapeutics/ (4256425)
5. 3 and 4 (149)
6. limit 5 to (English language and humans and yr= “1993 -Current”) (99)
